# Supplementary material for: Comparison between non-pulmonary and pulmonary immune responses in a HIV decedent who succumbed to COVID-19
Source: HighWire-hosted journal article supplement (doi:10.1136/gutjnl-2021-324754), 2021-08-10

# Supplementary figure 1

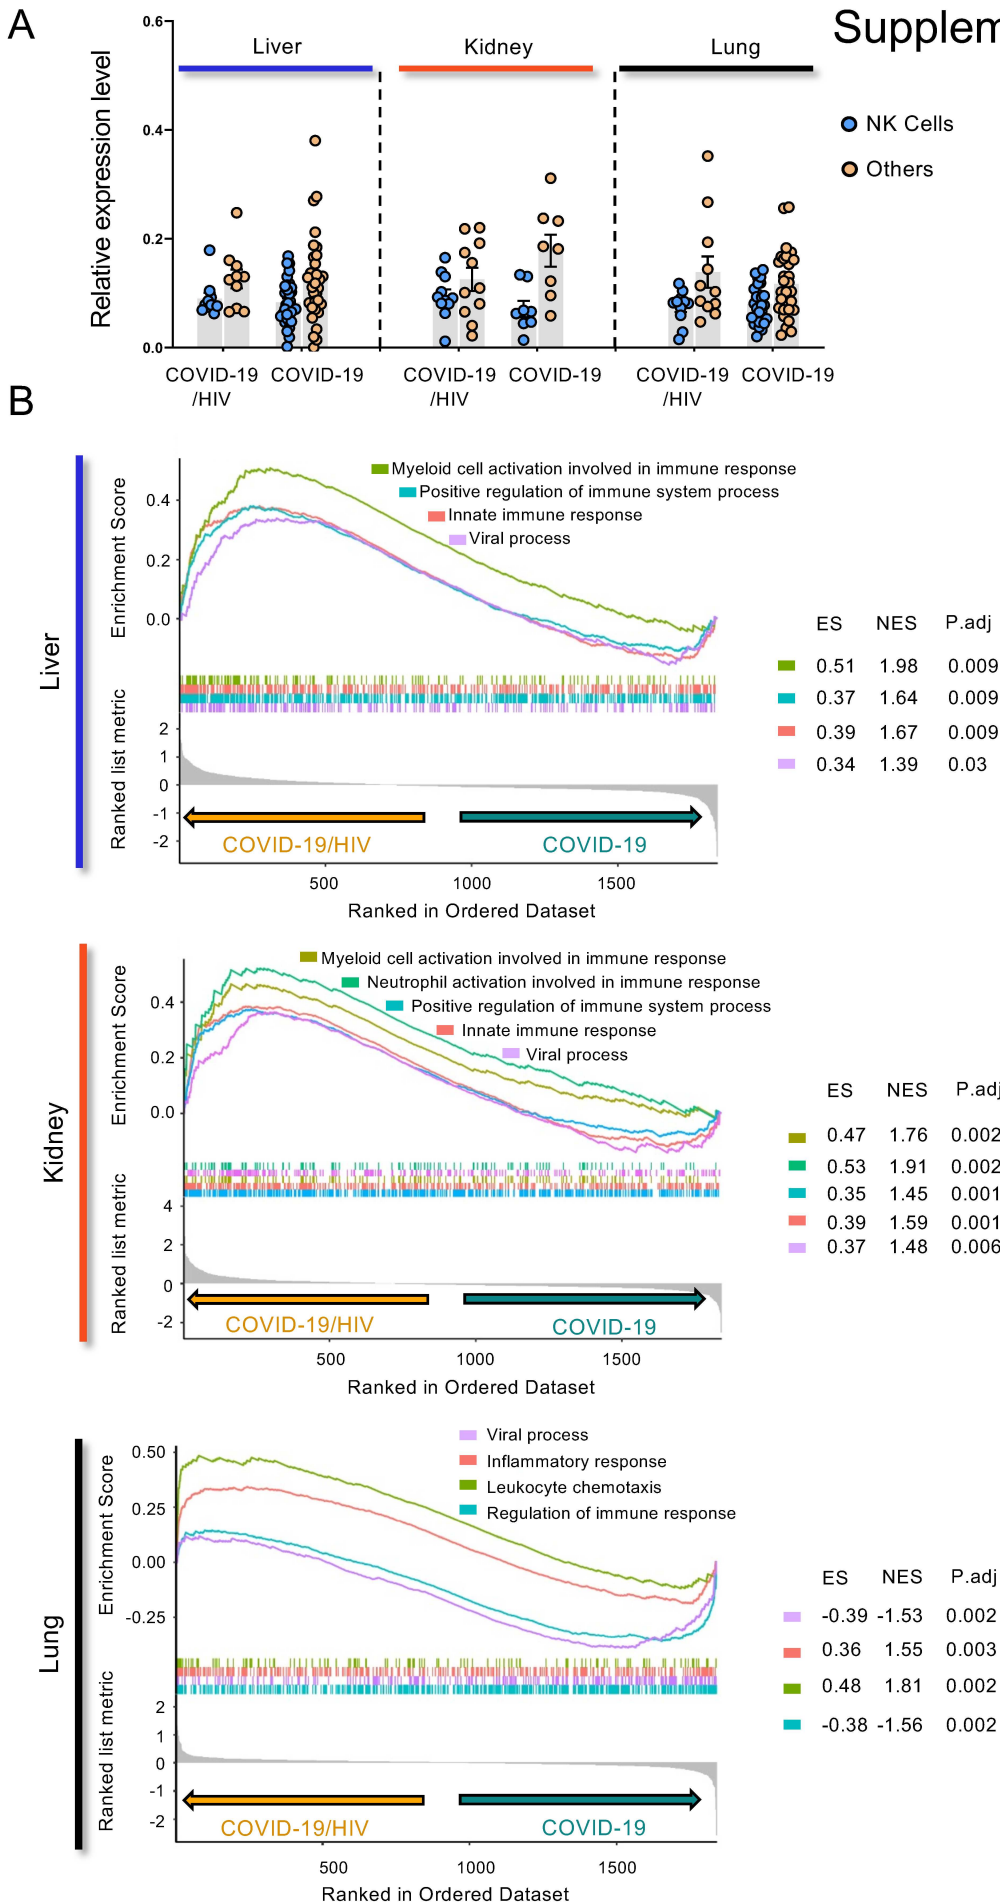

Supplement: gutjnl-2021-324754supp002_data_supplement.pdf [file gutjnl-2021-324754supp002_data_supplement.pdf]
